# Supplementary material for: Indirubin 3′-Oxime Inhibits Migration, Invasion, and Metastasis InVivo in Mice Bearing Spontaneously Occurring Pancreatic Cancer via Blocking the RAF/ERK, AKT, and SAPK/JNK Pathways
Source: PubMed Central journal article supplement — Transl Oncol. 2019 Oct 28;12(12):1574–82. doi: 10.1016/j.tranon.2019.08.010 (PMC6835019; doi:10.1016/j.tranon.2019.08.010), 2019-10-28
Supplement: mmc1.pdf [file mmc1.pdf]

**Supplementary Table 1. Pathological phenotype in Kras(G12D), Trp53(flox/+), Pdx1-cre mice with/without administration of Indox**

| ID # | Sex | Age (Days) | Injection (ip) | Pathological status | PDAC location                         | PDAC size (mm) | Pancreas weight (mg) | Direct invasion | Metastasis/Dissemination                                     |                                                                            |
|------|-----|------------|----------------|---------------------|---------------------------------------|----------------|----------------------|-----------------|--------------------------------------------------------------|----------------------------------------------------------------------------|
| 1    | 148 | M          | 89             | DMSO/PEG            | PDAC, moderately/poorly + anaplastic  | Head           | 13 x 10 x 5          | 1953.4          | Duodenum                                                     | LN's                                                                       |
| 2    | 131 | F          | 97             | DMSO/PEG            | PDAC, moderately                      | Head           | 13 x 12 x 10         | 1275.3          | Duodenum                                                     | Lungs                                                                      |
| 3    | 146 | F          | 101            | DMSO/PEG            | PDAC, moderately/poorly               | Body/Tail      | 13 x 13 x 11         | 3135.1          | Duodenum, liver, small and large intestines, retroperitoneum | Liver, Lungs, LN's, Dissemination (diaphragm, serosa of intestine, uterus) |
| 4    | 147 | M          | 143            | DMSO/PEG            | PDAC, moderately                      | Head           | 12 x 12 x 7          | 1540.6          | Duodenum                                                     | Liver, Lungs, LN's                                                         |
| 5    | 205 | M          | 121            | DMSO/PEG            | PDAC, moderately/poorly               | Head           | 7 x 7 x 6            | 837.1           | Pancreatic vein                                              | Dissemination (mesenterium)                                                |
| 6    | 230 | F          | 81             | DMSO/PEG            | mPanIN-1A                             | -              | -                    | 270.5           | -                                                            | -                                                                          |
| 7    | 236 | F          | 154            | DMSO/PEG            | PDAC, moderately/poorly               | Head           | 10 x 6 x 7           | 1057.3          | No                                                           | No                                                                         |
| 8    | 244 | M          | 165            | DMSO/PEG            | PDAC, moderately/poorly               | Head           | 10 x 10 x 8          | 1335.6          | Retroperitoneum                                              | Liver                                                                      |
| 9    | 245 | M          | 135            | DMSO/PEG            | PDAC, moderately/poorly + sarcomatoid | Head           | 20 x 10 x 10         | 3257.8          | Duodenum, Colon                                              | LN's                                                                       |
| 10   | 295 | F          | 174            | DMSO/PEG            | PDAC, moderately/poorly               | Head           | 12 x 10 x 10         | 1773.7          | Duodenum                                                     | Liver, LN's                                                                |
| 1    | 105 | F          | 181            | Indox               | mPanIN-1B                             | -              | -                    | 526.1           | -                                                            | -                                                                          |
| 2    | 110 | F          | 181            | Indox               | PDAC, well/moderately                 | Head           | 4 x 4 x 4            | 507.5           | No                                                           | No                                                                         |
| 3    | 193 | M          | 114            | Indox               | PDAC, moderately                      | Head           | 9 x 6 x 7            | 887.5           | No                                                           | No                                                                         |
| 4    | 194 | M          | 168            | Indox               | PDAC, moderately                      | Head           | 5 x 3 x 4            | 519             | No                                                           | No                                                                         |
| 5    | 226 | F          | 120            | Indox               | mPanIN-1A                             | -              | -                    | 366.8           | -                                                            | -                                                                          |
| 6    | 240 | F          | 156            | Indox               | PDAC, moderately                      | Tail           | 4 x 3 x 3            | 663.2           | No                                                           | No                                                                         |
| 7    | 274 | F          | 90             | Indox               | mPanIN-1A                             | -              | -                    | 194             | -                                                            | -                                                                          |
| 8    | 275 | F          | 139            | Indox               | PDAC, moderately                      | Head           | 15 x 12 x 8          | 2026.7          | Duodenum, liver, kidney                                      | LN                                                                         |
| 9    | 276 | F          | 104            | Indox               | mPanIN-1A                             | -              | -                    | 278.3           | -                                                            | -                                                                          |
