# Supplementary material for: Indirubin 3′-Oxime Inhibits Migration, Invasion, and Metastasis InVivo in Mice Bearing Spontaneously Occurring Pancreatic Cancer via Blocking the RAF/ERK, AKT, and SAPK/JNK Pathways
Source: PubMed Central journal article supplement — Transl Oncol. 2019 Oct 28;12(12):1574–82. doi: 10.1016/j.tranon.2019.08.010 (PMC6835019; doi:10.1016/j.tranon.2019.08.010), 2019-10-28
Supplement: mmc2.pdf [file mmc2.pdf]

**Supplementary Table 2. Pathological status of KPC(flox) mice with/without administration of Indox**

|                                                   | Vehicle (n = 9†) | Indox (n = 5†) | P              |
|---------------------------------------------------|------------------|----------------|----------------|
| <b>Glandular differentiation</b>                  |                  |                |                |
| Well/moderately                                   | 2/9 (22.2%)      | 5/5 (100%)     | <b>0.005 *</b> |
| Poorly/sarcomatoid/anaplastic                     | 7/9 (77.8%)      | 0/5 (0%)       |                |
| <b>Vascular invasion‡</b>                         |                  |                |                |
| Positive                                          | 6/6 (100%)       | 1/4 (25%)      | <b>0.011 *</b> |
| Negative                                          | 0/6 (0%)         | 3/4 (75%)      |                |
| <b>Lymphatic invasion‡</b>                        |                  |                |                |
| Positive                                          | 6/6 (100%)       | 1/4 (25%)      | <b>0.011 *</b> |
| Negative                                          | 0/6 (0%)         | 3/4 (75%)      |                |
| <b>Direct invasion to peripheral tissue/organ</b> |                  |                |                |
| Positive                                          | 7/9 (77.8%)      | 1/5 (20%)      | <b>0.036 *</b> |
| Negative                                          | 2/9 (22.2%)      | 4/5 (80%)      |                |
| <b>Lymph node metastasis</b>                      |                  |                |                |
| Positive (≥ 2 lymph nodes)                        | 5/9 (55.6%)      | 0/5 (0%)       | <b>0.038 *</b> |
| Negative (< 1 lymph node)                         | 4/9 (44.4%)      | 5/5 (100%)     |                |
| <b>Distant metastasis and/or dissemination</b>    |                  |                |                |
| Positive                                          | 6/9 (66.7%)      | 0/5 (0%)       | <b>0.016 *</b> |
| Negative                                          | 3/9 (33.3%)      | 5/5 (100%)     |                |

\*, significant by  $\chi^2$  test

†, used PDAC case only

‡, excepted dead found cases due to unclear immunostaining
