# Supplementary material for: Indirubin 3′-Oxime Inhibits Migration, Invasion, and Metastasis InVivo in Mice Bearing Spontaneously Occurring Pancreatic Cancer via Blocking the RAF/ERK, AKT, and SAPK/JNK Pathways
Source: PubMed Central journal article supplement — Transl Oncol. 2019 Oct 28;12(12):1574–82. doi: 10.1016/j.tranon.2019.08.010 (PMC6835019; doi:10.1016/j.tranon.2019.08.010), 2019-10-28
Supplement: mmc3.pdf [file mmc3.pdf]

**A**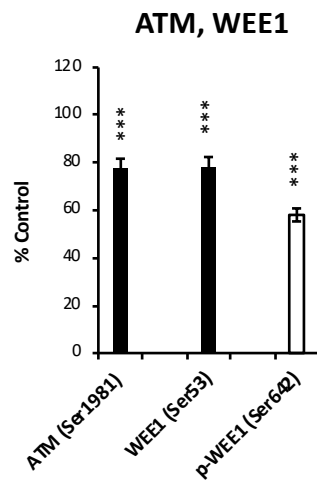**B**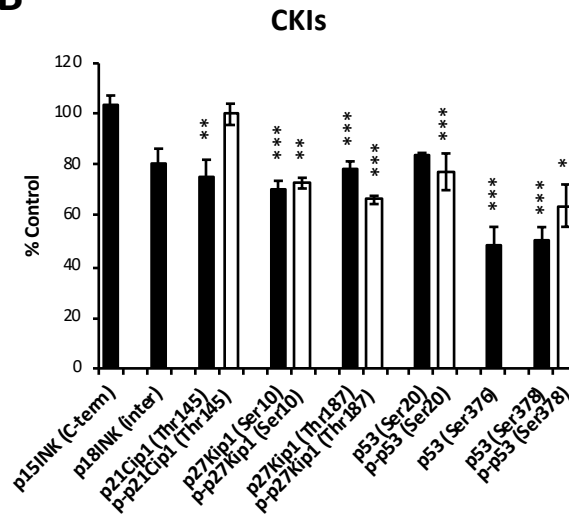**C**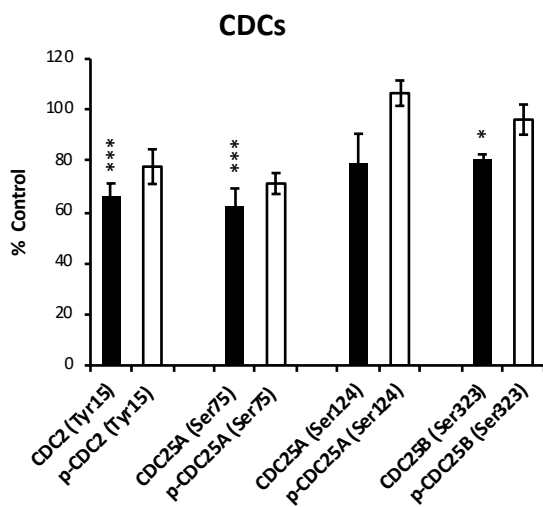**D**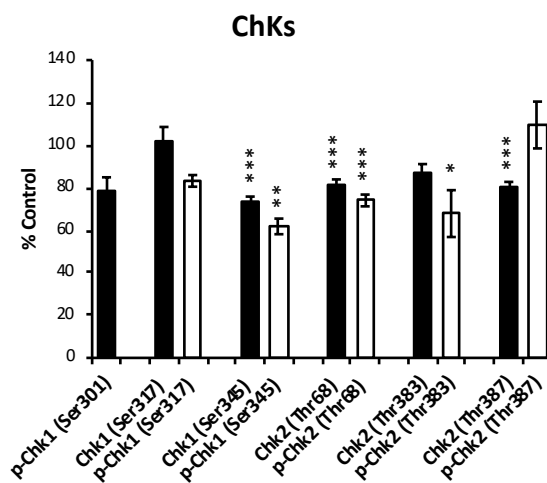

**Supplementary Fig. 1.** Antibody array analysis for ATM, WEE1, cyclin-dependent kinase inhibitor (CKIs), Mouse PDAC cells were treated with Indox. \* $p < 0.05$ ; \*\* $p < 0.01$ ; \*\*\* $p < 0.001$  vs. vehicle control by ANOVA Tukey's test.

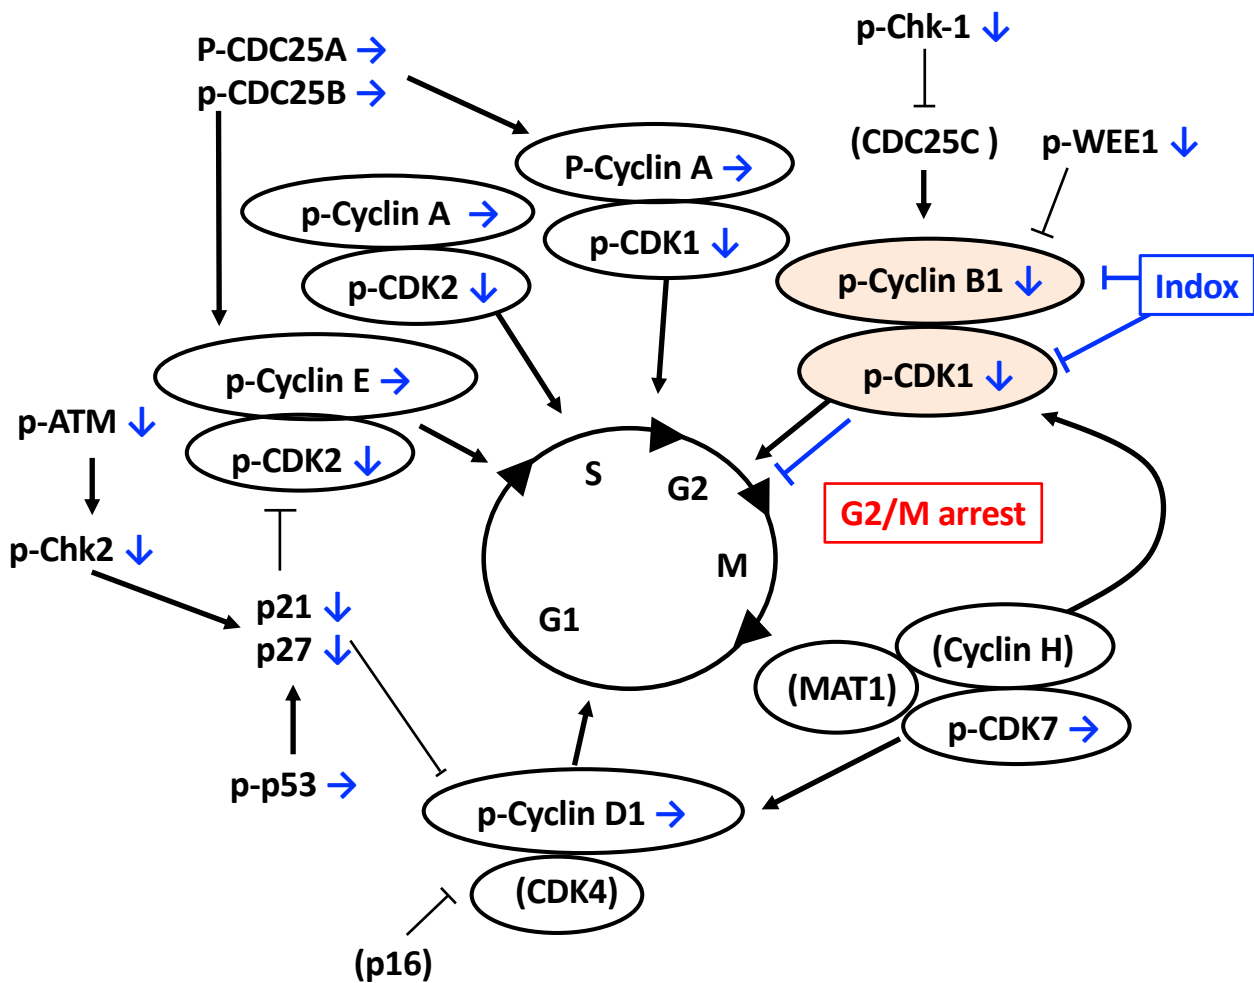

**Supplementary Fig. 2.** A schematic diagram of the effects of Indox on cell cycle-related molecules, including CDKs and cyclins.

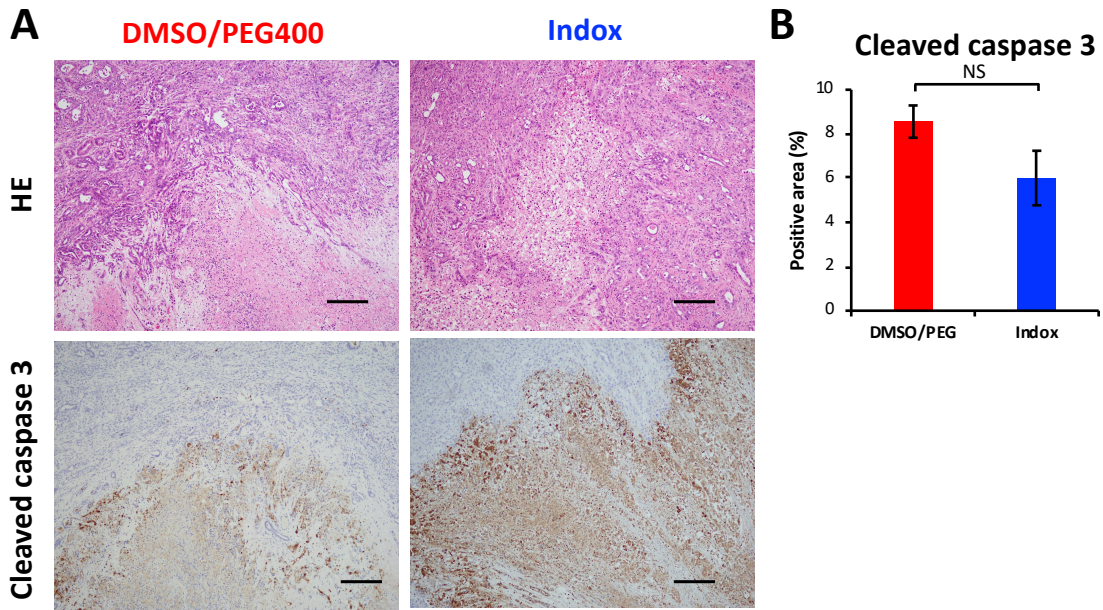

**Supplementary Fig. 3.** Apoptotic status in PDAC tissues from *KPC<sup>fllox</sup>* mice treated with Indox. (A) HE staining and immunostaining for the apoptotic marker cleaved caspase-3 were performed. Scale bars, 100  $\mu$ m. (B) Quantification of cleaved caspase-3-positive area. Data are presented as mean  $\pm$  SD from four fields at 40X original magnification. \* $p < 0.05$ ; \*\* $p < 0.01$  vs. vehicle control.

### A Bcl-2 family

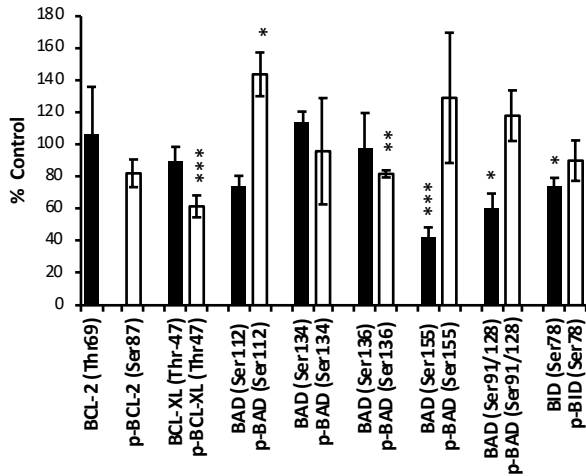

### B Caspases

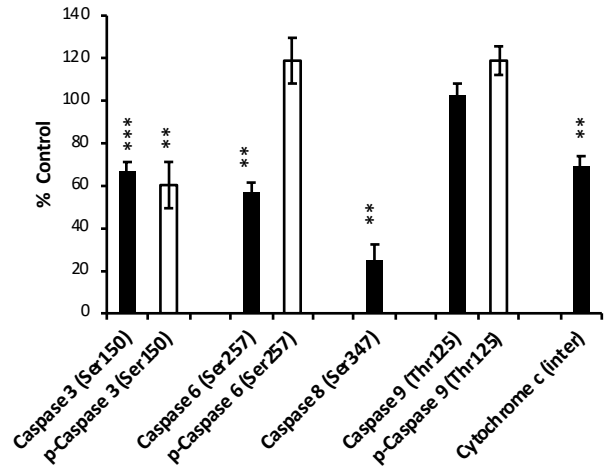

### C p70S6K

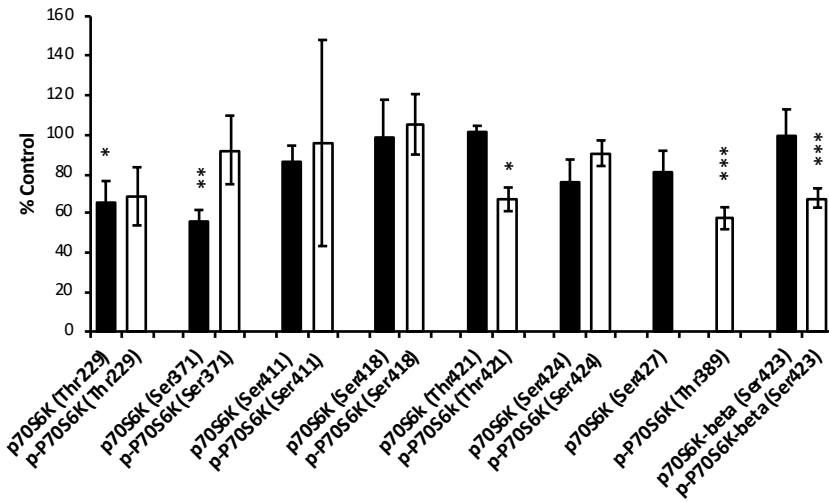

### D p90RSK

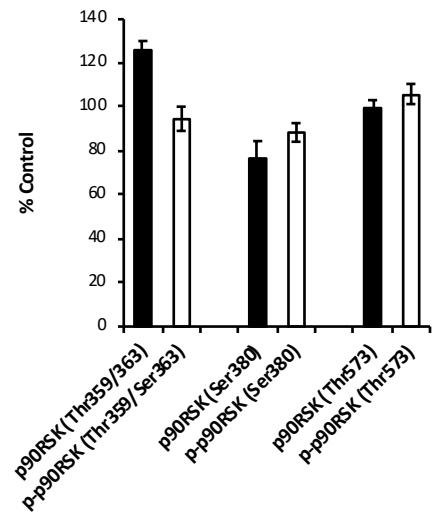

**Supplementary Fig. 4.** Antibody array analysis for Bcl-2 family members, caspases, p70S6K and p90RSK in a mouse PDAC cell line. \* $p < 0.05$ ; \*\* $p < 0.01$ ; \*\*\* $p < 0.001$  vs. vehicle control by ANOVA Tukey's test.

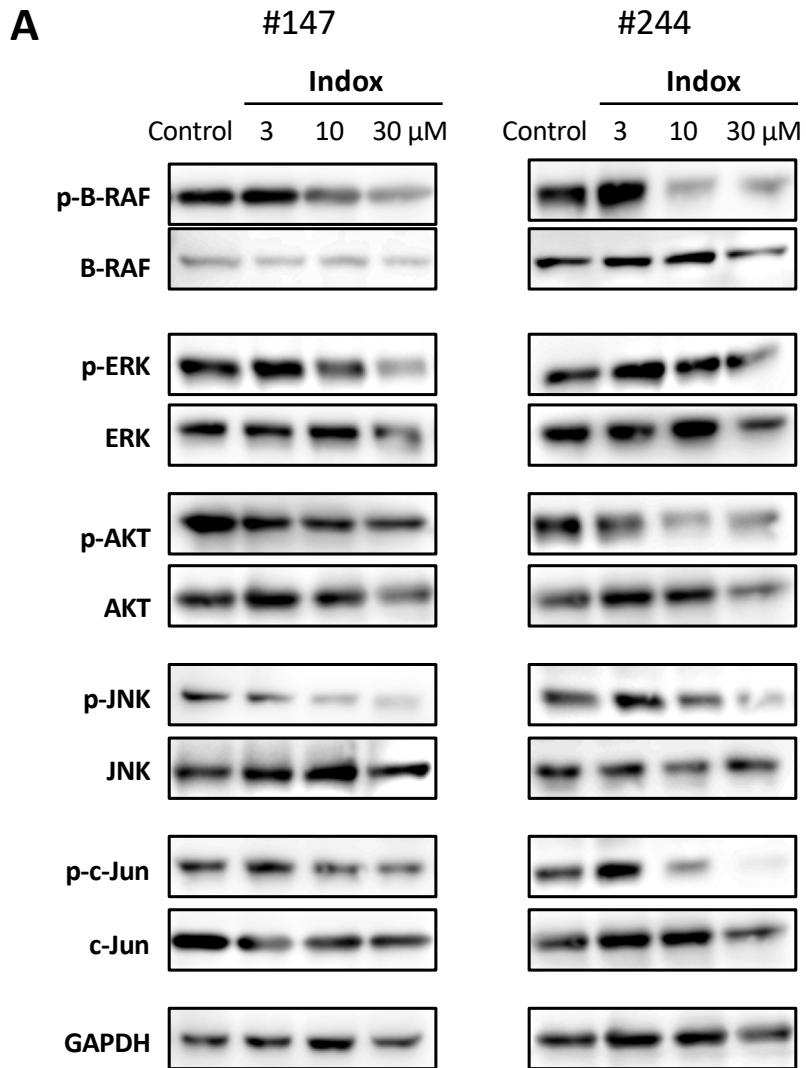

**Supplementary Fig. 5A.** Inhibition of phosphorylated RAF/ERK, AKT, SAPK/JNK c-Jun by Indox.

(A) After treatment with indicated concentration of Indox for 24 h, low levels of p-B-RAF (Ser446), p-ERK (Tyr204), p-AKT (Thr308), p-SAPK/JNK (Tyr183) and p-c-Jun (Thr91) in the murine PDAC cell lines (#147 and #244) were detected by immunoblotting.

**B**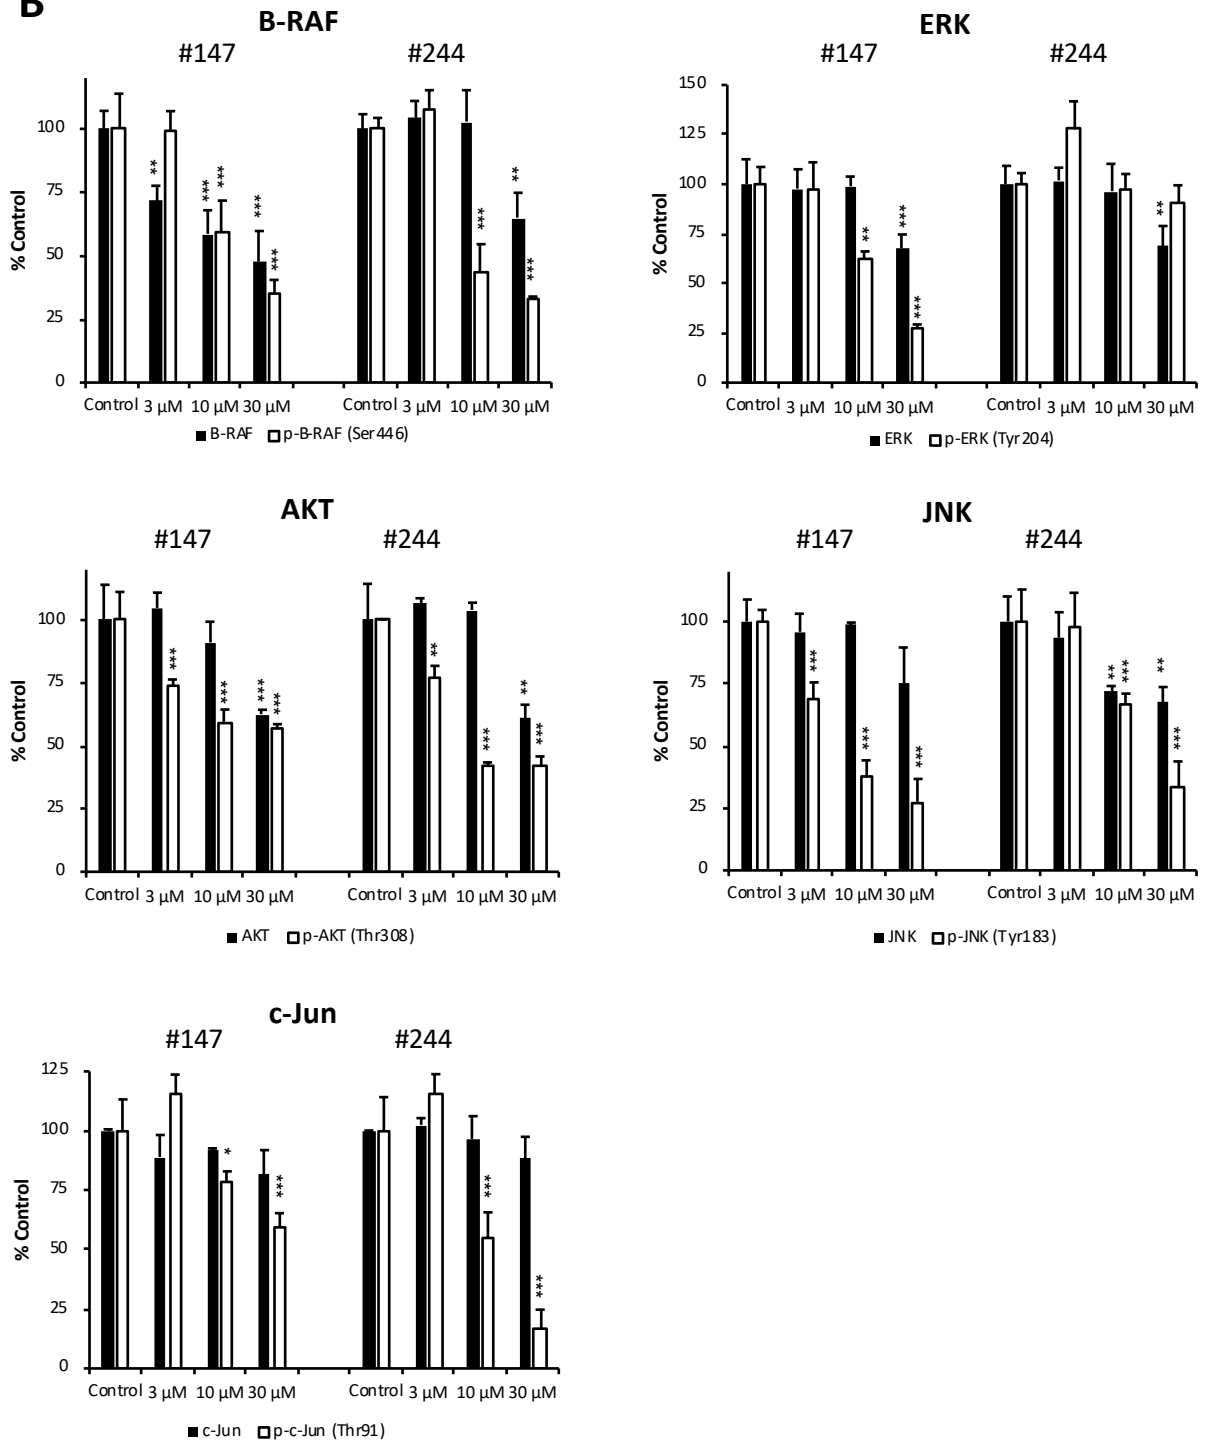**Supplementary Fig. 5B.**

(B) Quantification of data presented in A. \* $p < 0.05$ ; \*\* $p < 0.01$ ; \*\*\* $p < 0.001$  vs vehicle control by ANOVA Tukey's test.

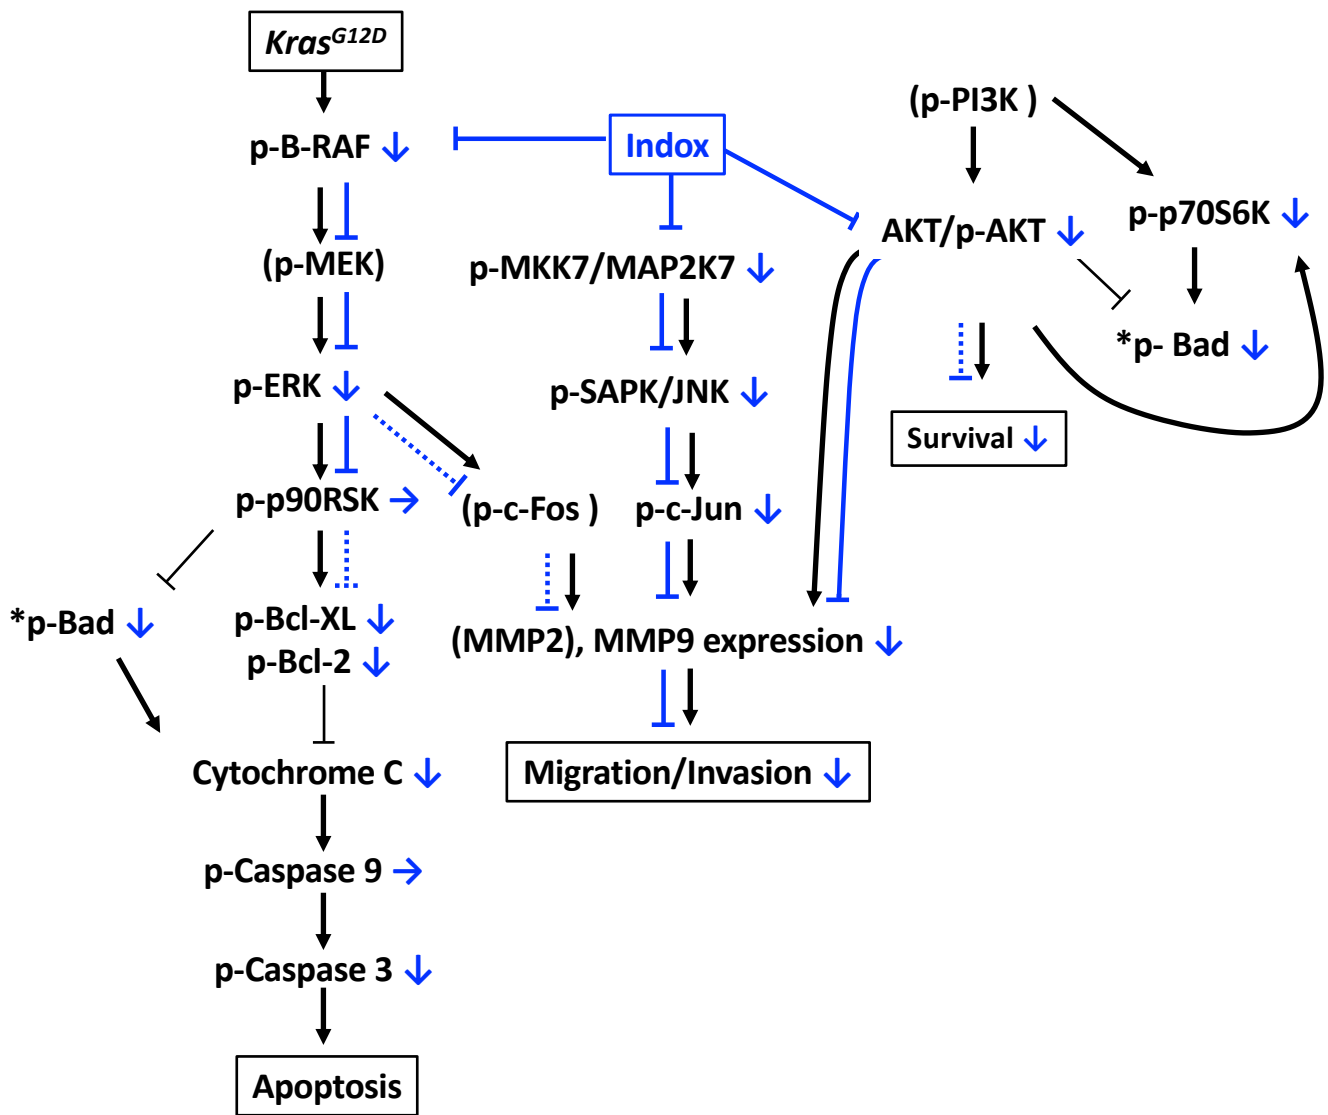

**Supplementary Fig. 6.** A schematic diagram of cell signaling pathways including RAF/ERK, AKT and SAPK/JNK.
